# Supplementary material for: Calcineurin Governs Thermotolerance and Virulence of Cryptococcus gattii
Source: PubMed Central journal article supplement (PMC3583459; doi:10.1534/g3.112.004242), 2013-03-01
Supplement: supp_3.3.527_FigureS2.pdf [file supp_3.3.527_FigureS2.pdf]

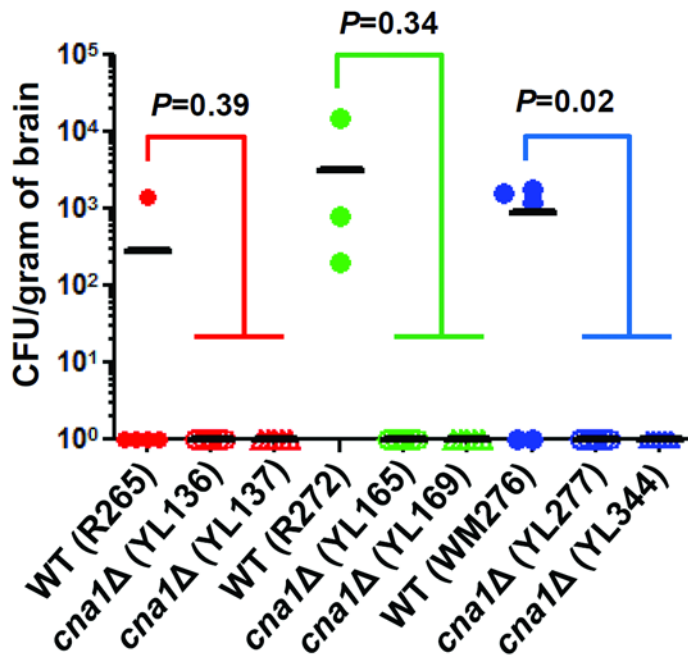

Figure S2 The fungal burden of *C. gattii* wild-type and calcineurin mutants in the brain. The fungal burden in the brain was determined at 14 days post-infection ( $5 \times 10^4$  cells per mouse). Five mice per strain were used. *P* values were determined by ANOVA and Dunnett's multiple comparison tests.
