# Supplementary material for: Calcineurin Governs Thermotolerance and Virulence of Cryptococcus gattii
Source: PubMed Central journal article supplement (PMC3583459; doi:10.1534/g3.112.004242), 2013-03-01
Supplement: supp_3.3.527_FigureS3.pdf [file supp_3.3.527_FigureS3.pdf]

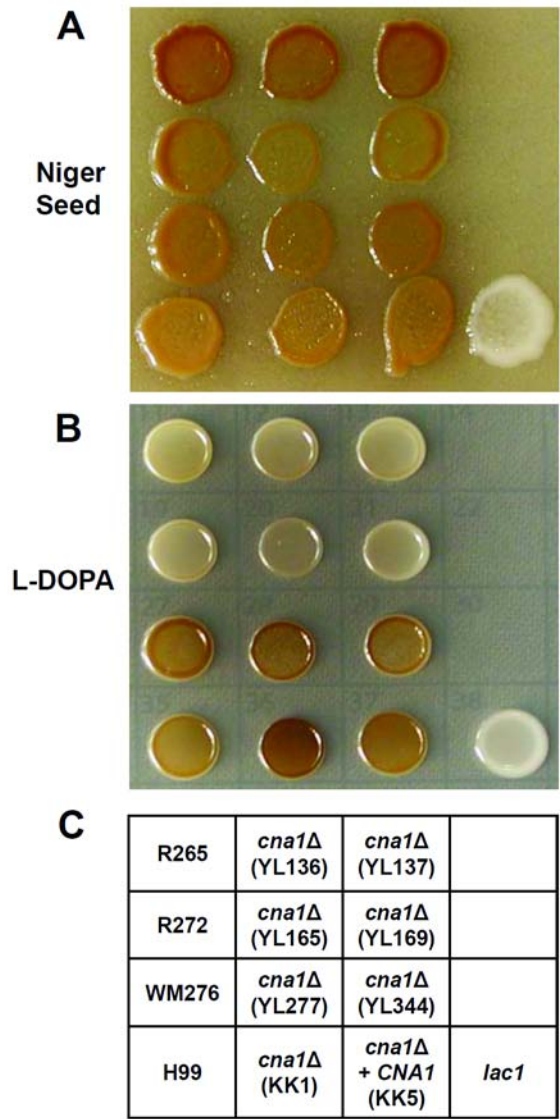

**Figure S3** Calcineurin is not required for melanin production in *C. gattii* and *C. neoformans*. Cells were grown overnight at 24°C, washed twice with dH<sub>2</sub>O, diluted to 1 OD<sub>600</sub>/ml, and 3 μl of cell suspension was plated on Niger seed (**A**) and L-DOPA (**B**) agar medium and incubated for 72 hr at 24°C. Strains analyzed are indicated in panel (**C**).
