# Supplementary material for: Calcineurin Governs Thermotolerance and Virulence of Cryptococcus gattii
Source: PubMed Central journal article supplement (PMC3583459; doi:10.1534/g3.112.004242), 2013-03-01
Supplement: supp_3.3.527_FigureS4.pdf [file supp_3.3.527_FigureS4.pdf]

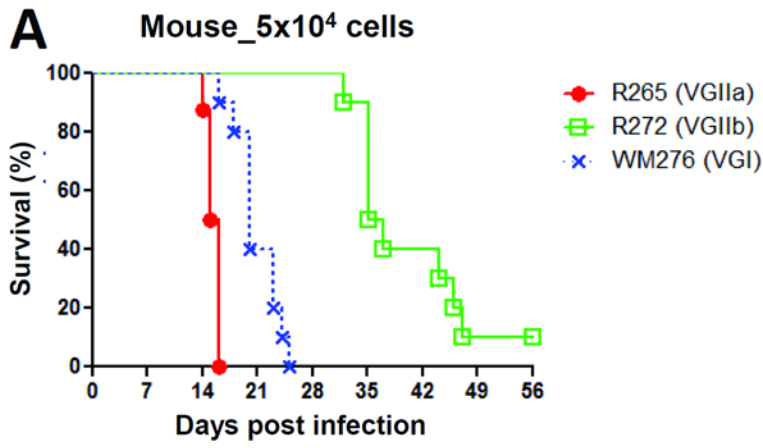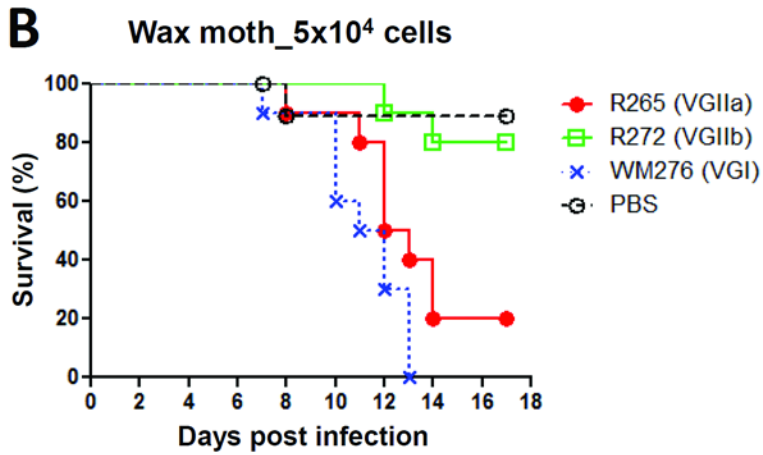

**Figure S4 Comparison of *C. gattii* wild-type virulence in both murine inhalation and wax moth models.** The data of *C. gattii* wild-type virulence in the murine inhalation (A) and wax moth models (B) were extracted from Figure 4 and Figure S5. Each mouse or wax moth received 5x10<sup>4</sup> *C. gattii* yeast cells.
