# Supplementary material for: Calcineurin Governs Thermotolerance and Virulence of Cryptococcus gattii
Source: PubMed Central journal article supplement (PMC3583459; doi:10.1534/g3.112.004242), 2013-03-01
Supplement: supp_3.3.527_FigureS5.pdf [file supp_3.3.527_FigureS5.pdf]

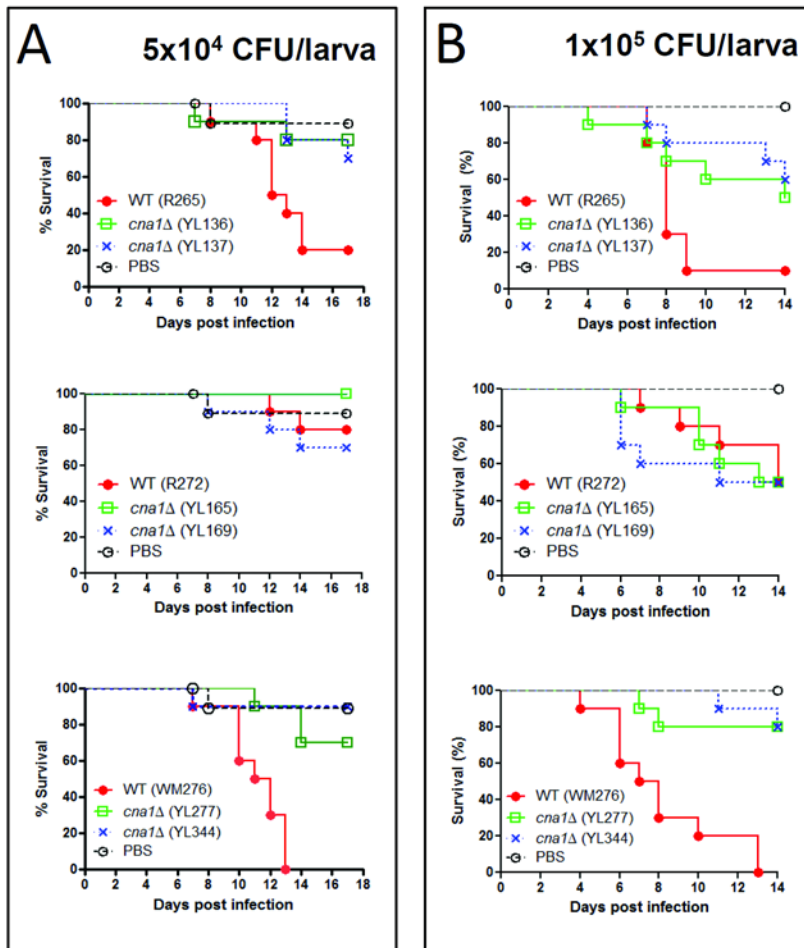

**Figure S5** Roles of *C. gattii* calcineurin in the wax moth model. Survival of *Galleria mellonella* after injection of  $5 \times 10^4$  (A) or  $10^5$  (B) CFU/larva of *C. gattii* wild-type or calcineurin mutants (10 moths per isolate).
