# Supplementary material for: Calcineurin Governs Thermotolerance and Virulence of Cryptococcus gattii
Source: PubMed Central journal article supplement (PMC3583459; doi:10.1534/g3.112.004242), 2013-03-01
Supplement: supp_3.3.527_TableS1.pdf [file supp_3.3.527_TableS1.pdf]

**Table S1 PCR primers used in this study.**

| Primer    | Use                               | Sequence (5' → 3')                             |
|-----------|-----------------------------------|------------------------------------------------|
| JC65      | <i>NAT</i> marker (M13 Forward)   | GTAAAACGACGGCCAGT                              |
| JC66      | <i>NAT</i> marker (M13 Reverse)   | GGAAACAGCTATGACCATG                            |
| JC174     | R265 & R272 5' NCR of <i>CNA1</i> | TCTTGGGATTAGCCTCTCCCT                          |
| JC175     | R265 & R272 5' NCR of <i>CNA1</i> | <u>ACTGGCCGTCGTTTTACGGAAGTTGACTGATTGGTGGT</u>  |
| JC176     | R265 & R272 3' NCR of <i>CNA1</i> | <u>CATGGTCATAGCTGTTTCCAGTTTCGAACGATGGAATCG</u> |
| JC177     | R265 & R272 3' NCR of <i>CNA1</i> | TTGGCTGACAAACCCGCTA                            |
| JC178     | R265 & R272 Overlap PCR           | GGAAGGCCAAAGGATTTACA                           |
| JC179     | R265 & R272 Overlap PCR           | AAGGTAAGACTCCAGGCGAA                           |
| JC203     | R265 & R272 <i>CNA1 ORF</i>       | TCAGAACCAAACCTTGCTGGA                          |
| JC204     | R265 & R272 <i>CNA1 ORF</i>       | TCCAAGAAGTACATGCAGCA                           |
| JC207     | WM276 5' NCR of <i>CNA1</i>       | TCTTGGGATTAGCCTCTCCCT                          |
| JC208     | WM276 5' NCR of <i>CNA1</i>       | <u>ACTGGCCGTCGTTTTACAAGTTGGCTGACTAGTGGTGG</u>  |
| JC209     | WM276 3' NCR of <i>CNA1</i>       | <u>CATGGTCATAGCTGTTTCTGATCGAATCGTTTGAACGAC</u> |
| JC210     | WM276 3' NCR of <i>CNA1</i>       | TGCCAAAAAAGTACGTCTG                            |
| JC211     | WM276 overlap PCR                 | AGGAAGGCCAAAGGATTTACA                          |
| JC212     | WM276 overlap PCR                 | TACCCTTACATCTTTGTACG                           |
| JOHE23397 | WM276 <i>CNA1 ORF</i>             | GGACGTGTTACCTGGAGTT                            |
| JOHE23398 | WM276 <i>CNA1 ORF</i>             | AGCAAGGCTTAA TGGCAGAA                          |
